# Supplementary material for: Third Early “Booster” Dose Strategy in France of bnt162b2 SARS-CoV-2 Vaccine in Allogeneic Hematopoietic Stem Cell Transplant Recipients Enhances Neutralizing Antibody Responses
Source: MDPI journal article supplement (doi:10.3390/v14091928), 2022-08-30
Supplement: s1 [file s1]

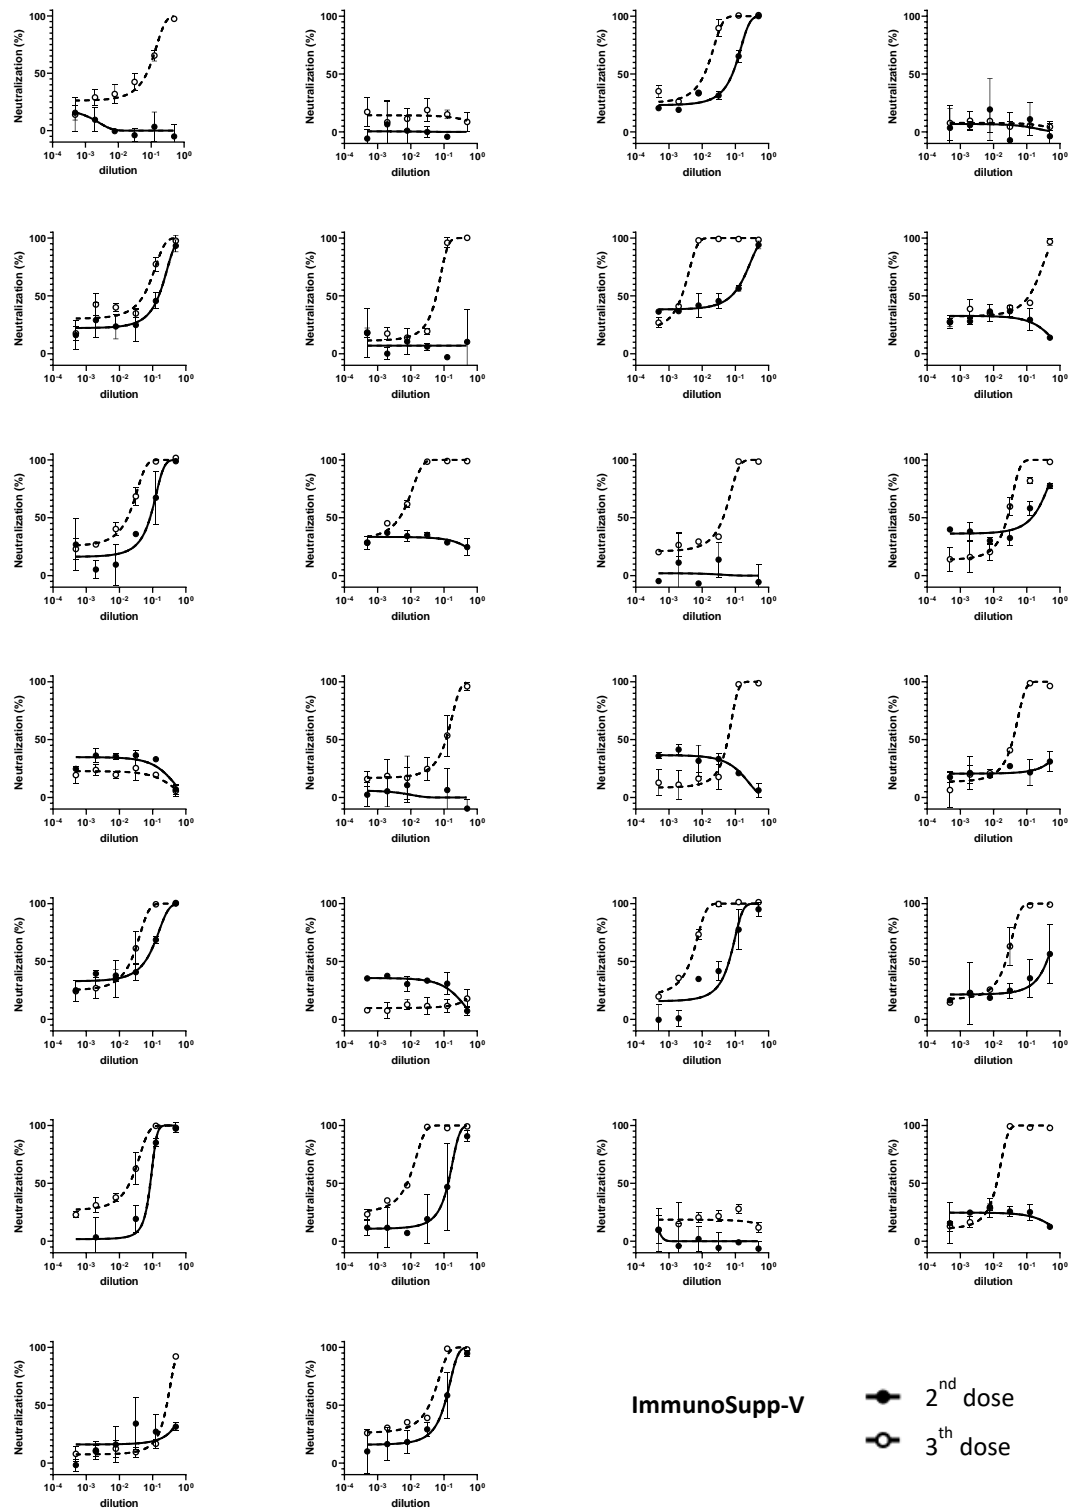

**Figure S1.** Individual neutralization curves against SARS-CoV-2 variant Delta of sera obtained after 2 doses (black line) or 3 doses (dotted line) of the BNT162b2 vaccine in 26 allogeneic HSCT recipients from the ImmunoSupp-V group. The experiments were performed in triplicate, and means $\pm$ SD are shown.

**Table S1. Amino acid substitutions in the Spike gene of the clinical samples and culture-expanded viruses.** Viruses isolated from clinical samples and culture-expanded viruses were sequenced and their consensus genome sequences were compared to the reference sequence from Wuhan strain Hu-1 in bold (Accession number MN908947). Letters indicate amino acids, numbers indicate amino acid positions. NTD: N-terminal domain; RBD: receptor-binding domain; RBM: receptor-binding motif; FCS: furin cleavage site.

|       | Lineage   |                 | NTD      |          |          |          |          |          | RBD      |          |          |          |          |          | RBM      | FCS      |          |          |          |          |
|-------|-----------|-----------------|----------|----------|----------|----------|----------|----------|----------|----------|----------|----------|----------|----------|----------|----------|----------|----------|----------|----------|
|       |           | Spike position  | 18       | 69       | 70       | 241      | 242      | 243      | 417      | 452      | 477      | 478      | 484      | 501      | 614      | 681      | 682      | 683      | 684      | 685      |
|       |           | AA (Wuhan Hu-1) | <b>L</b> | <b>H</b> | <b>V</b> | <b>L</b> | <b>L</b> | <b>A</b> | <b>K</b> | <b>L</b> | <b>S</b> | <b>T</b> | <b>E</b> | <b>N</b> | <b>D</b> | <b>P</b> | <b>R</b> | <b>R</b> | <b>A</b> | <b>R</b> |
| D614G | B.1       | Clinical sample |          |          |          |          |          |          |          |          |          |          |          |          | G        |          |          |          |          |          |
|       |           | Expanded virus  |          |          |          |          |          |          |          |          |          |          | D        |          | G        |          |          |          |          | H        |
| Beta  | B.1.351   | Clinical sample | F        |          |          | Δ        | Δ        | Δ        | N        |          |          |          | K        | Y        | G        |          |          |          |          |          |
|       |           | Expanded virus  | F        |          |          | Δ        | Δ        | Δ        | N        |          |          |          | K        | Y        | G        |          | Q        |          |          |          |
| Delta | B.1.617.2 | Clinical sample |          |          |          |          |          |          |          | R        |          | K        |          |          | G        | R        |          |          |          |          |
|       |           | Expanded virus  |          |          |          |          |          |          |          | R        |          | K        |          |          | G        | R        |          |          |          |          |
